# Supplementary material for: Methods for Calculation of Stormwater Treatment Required for Meeting Receiving Waters Quality: Application in a Case Study
Source: MDPI journal article supplement (doi:10.3390/su142215395), 2022-11-19
Supplement: s1 [file s1]

## Supplementary Materials. Original (standard) reference titles that were translated in the References

12. Lampa M.E.; Petersson J.F; Engene N. *Metod för beräkning av åtgärdsbehovet för övergödning*, Version 1.0, Vattenmyndigheterna i samverkan, Luleå, Härnösand, Västerås, Kalmar and Göteborg, Sweden, 2020. (In Swedish).
15. Havs- och Vattenmyndigheten. Havs- och vattenmyndighetens föreskrifter om klassificering och miljökvalitetsnormer avseende ytvatten.; HVMFS 2013:19; Havs- och Vattenmyndigheten: Göteborg, Sweden, 2017. (In Swedish)
24. Gustavsson H.; Tengdelius Brunell J.; Temnerud J. *Avrinning och retention till PLC7 - Närsaltsbelastning på Östersjön 2017. SMED Rapport Nr 2*. Sveriges meteorologiska och hydrologiska institut, Norrköping, Stockholm, 2019. (In Swedish)
25. Ejhed H.; Widén-Nilsson E.; Tengdelius Brunell J.; Hytteborn, J. *Näringsbelastningen på Östersjön och Västerhavet 2014 – Sveriges underlag till HELCOM:s sjätte Pollution Load Compilation. Rapport 2016:12*. ISBN 978-91-87967-21-4. Havs- och vattenmyndigheten, 2016. (In Swedish)
27. Sveriges Meteorologiska och Hydrologiska Institut. Dataserier med normalvärden för perioden 1991-2020. Available online: <https://www.smhi.se/data/meteorologi/dataserier-med-normalvarden-for-perioden-1991-2020-1.167775> (accessed on 10 July 2022). (In Swedish)
29. Järfälla kommun. *Riktlinjer för dagvattenhantering. Riktlinjerna är fastställda av Kommunfullmäktige 2016-12-12*. Available online: <https://www.jarfalla.se/download/18.587b8e0515c91377501f1ca9/1560948738901/riktlinjer-dagvattenhantering.pdf>. (accessed on 10 July 2022). (In Swedish).
